# Supplementary material for: Age independent survival benefit for patients with hepatocellular carcinoma (HCC) without metastases at diagnosis: a population-based study
Source: PubMed Central journal article supplement — Gut. 2019 Mar 16;69(1):168–76. doi: 10.1136/gutjnl-2018-318193 (PMC6943246; doi:10.1136/gutjnl-2018-318193), 2019-03-16
Supplement: gutjnl-2018-318193supp001.pdf [file gutjnl-2018-318193supp001.pdf]

Additional table 1: Diagnostic and treatment modality by period of initial diagnosis (1998-2016, n=4078)

| Period of initial diagnosis         |                       | 1998-2002 |                  | 2003-2007 |                  | 2008-2012 |                  | 2013-2016 |                  | Total  |                  | p-value |
|-------------------------------------|-----------------------|-----------|------------------|-----------|------------------|-----------|------------------|-----------|------------------|--------|------------------|---------|
|                                     |                       | n=623     |                  | n=1009    |                  | n=1412    |                  | n=1034    |                  | n=4078 |                  |         |
|                                     |                       | n         | (%) <sup>a</sup> | n      | (%) <sup>a</sup> |         |
| <b>Treatment</b>                    | Liver resection       | 106       | (28.6)           | 189       | (33.0)           | 252       | (28.4)           | 216       | (32.8)           | 763    | (30.7)           | <0.0001 |
|                                     | Liver transplantation | 9         | (2.4)            | 15        | (2.6)            | 38        | (4.3)            | 25        | (3.8)            | 87     | (3.5)            |         |
|                                     | RFA                   | 9         | (2.4)            | 39        | (6.8)            | 78        | (8.8)            | 70        | (10.6)           | 196    | (7.9)            |         |
|                                     | TACE                  | 56        | (15.1)           | 141       | (24.6)           | 285       | (32.1)           | 179       | (27.2)           | 661    | (26.6)           |         |
|                                     | SIRT                  | 7         | (1.9)            | 9         | (1.6)            | 38        | (4.3)            | 48        | (7.3)            | 102    | (4.1)            |         |
|                                     | Chemotherapy          | 69        | (18.6)           | 79        | (13.8)           | 86        | (9.7)            | 18        | (2.7)            | 252    | (10.1)           |         |
|                                     | Targeted therapy      |           |                  |           |                  | 54        | (6.1)            | 35        | (5.3)            | 89     | (3.6)            |         |
|                                     | others <sup>b</sup>   | 115       | (31.0)           | 101       | (17.6)           | 56        | (6.3)            | 67        | (10.2)           | 339    | (13.6)           |         |
|                                     | <i>not available</i>  | 252       | (40.5)           | 436       | (43.2)           | 525       | (37.2)           | 376       | (36.4)           | 1589   | (39.0)           |         |
| <b>Pathological<br/>diagnostics</b> | none                  | 228       | (36.6)           | 299       | (29.6)           | 539       | (38.2)           | 432       | (41.8)           | 1498   | (36.7)           | <0.0001 |
|                                     | liver biopsy          | 318       | (51.0)           | 530       | (52.5)           | 620       | (43.9)           | 385       | (37.2)           | 1853   | (45.4)           |         |
|                                     | surgical specimen     | 77        | (12.4)           | 180       | (17.8)           | 253       | (17.9)           | 217       | (21.0)           | 727    | (17.8)           |         |

RFA: Radiofrequency ablation      TACE: Transarterial chemoembolisation      SIRT: Selective internal radiation therapy (radioembolisation)

<sup>a</sup> Missing values were excluded from calculations of frequency distribution, column percentage can differ slightly from 100% due to rounding.

<sup>b</sup> e.g. palliative surgery, best supportive care
